# Supplementary material for: TiO2/nanoporous silicon hybrid contact for heterojunction crystalline solar cell
Source: Royal Society of Chemistry journal article supplement (doi:10.1039/c6ra07165a), 2016-01-01
Supplement: c6ra07165a1.pdf [file c6ra07165a1.pdf]

## Supporting Information

**Manuscript title:** TiO<sub>2</sub>/Nanoporous Silicon, Hybrid Contact for Heterojunction Crystalline Solar Cell

**Authors:** Hamid Ghorbani Shiraz <sup>a, b†</sup>, Fatemeh Razi Astarai <sup>c</sup>, Raheleh Mohammadpour <sup>d</sup>

<sup>a</sup> School of Chemical Engineering, College of Engineering, University of Tehran, Tehran, Iran

<sup>b</sup> Young Researchers and Elite Club, Mashhad Branch, Islamic Azad University, Mashhad, Iran

<sup>c</sup> Faculty of New Sciences and Technologies, University of Tehran, Tehran, Iran

<sup>d</sup> Institute for Nanoscience and Nanotechnology, Sharif University of Technology, Tehran, Iran

Corresponding Author:

† Hamid Ghorbani Shiraz

Tel. +98 915 117 2685

E-mail: [h.gh.sh7@hotmail.com](mailto:h.gh.sh7@hotmail.com)

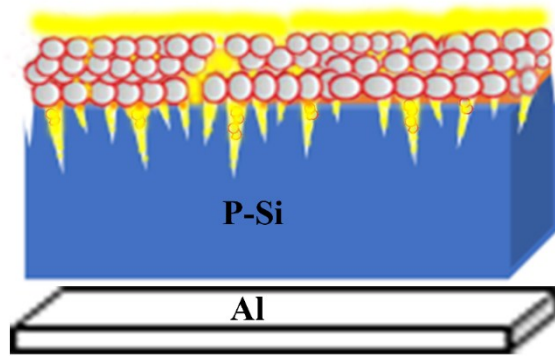

**S1.** Hybrid solar cell; n-type semiconductor (brown) has been kept just in the base of pores sidewall; porous structure has provided desirable substrate for  $\text{TiO}_2$  nanoparticles (circle) immobilization also channels to p-type silicon; ITO (yellow) may diffuse through the channels; local p-n heterojunction have formed through minor diffusion of  $\text{TiO}_2$  nanoparticles to the p-type pores.

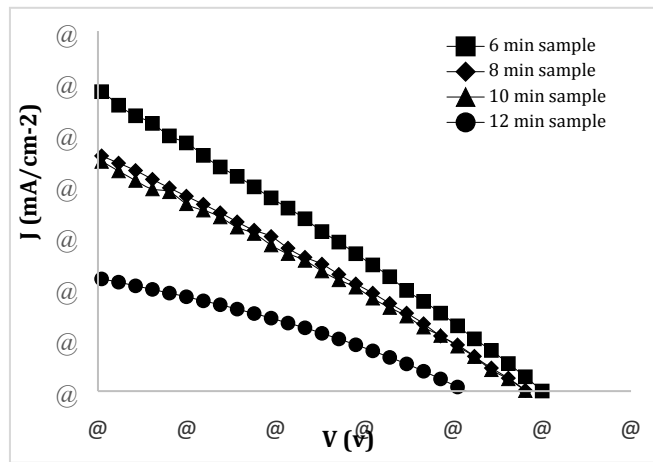

**S2.** Typical J-V measurements for ITO/TiO<sub>2</sub>/PPS/PS solar cells with different duration of anodization.

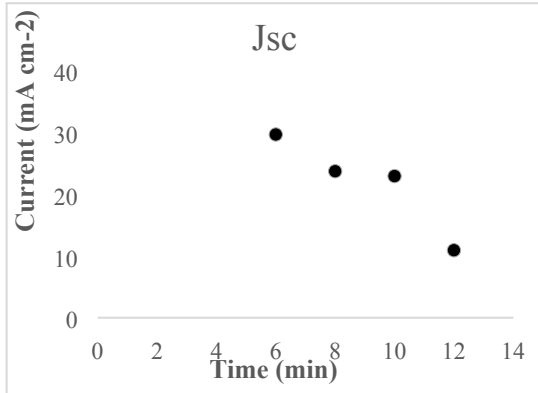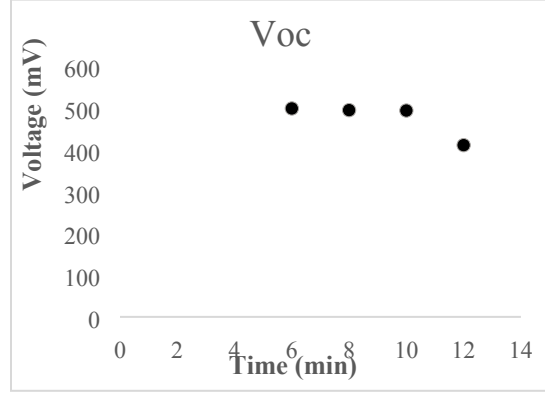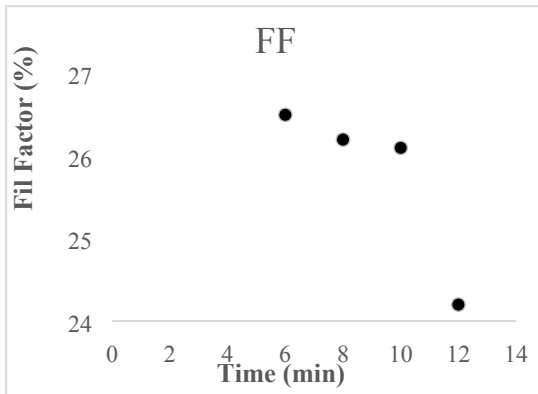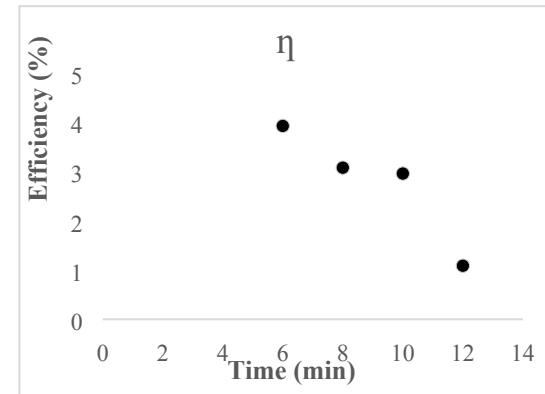

**S3.** Comparison of photovoltaic parameters in various anodization time.

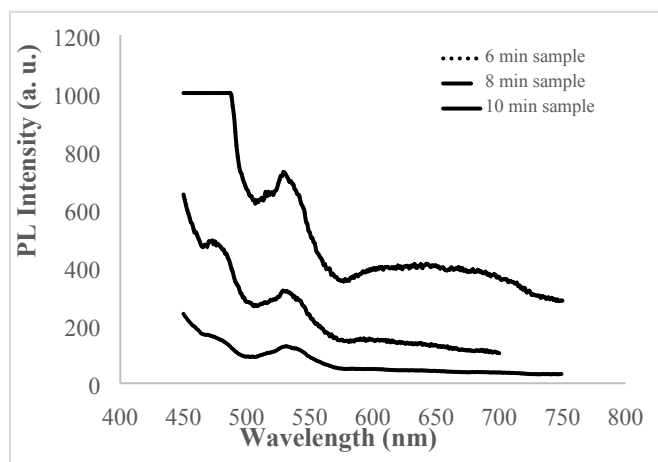

**S4.** PL measurement (excitation wavelength= 400 nm)
